# Supplementary material for: Copper foam in situ loaded with precious metal nanoparticles as transmission SEIRAS substrate for rapid detection of dithiocarbamate pesticides
Source: Royal Society of Chemistry journal article supplement (doi:10.1039/d0ay01044h), 2020-01-01
Supplement: d0ay01044h1.pdf [file d0ay01044h1.pdf]

## Supporting information

### **Copper foam *in situ* loaded with precious metal nanoparticles as transmission SEIRAS substrate for rapid detection of dithiocarbamate pesticides**

Xincheng Jiang<sup>a,ξ</sup>, Wen Liu<sup>a,ξ</sup>, Bin Luo<sup>c</sup>, Xuke Liu<sup>a</sup>, Yuting Huang<sup>a</sup>, Dongmei Wang<sup>a</sup>, Meikun Fan<sup>a,b,\*</sup>, Zhengjun Gong<sup>a,b,\*</sup>

<sup>a</sup> Faculty of Geosciences and Environmental Engineering, Southwest Jiaotong University, Chengdu, 611756, China.

<sup>b</sup> State-province Joint Engineering Laboratory of Spatial Information Technology of High-Speed Rail Safety, Chengdu, 611756, China.

<sup>c</sup> Sichuan Academy of Environmental policy and planning, Chengdu, 610000, China

<sup>ξ</sup> The first two authors contributed equally to this work.

\* Corresponding author: [meikunfan@gmail.com](mailto:meikunfan@gmail.com); [gongzhengjun@126.com](mailto:gongzhengjun@126.com)

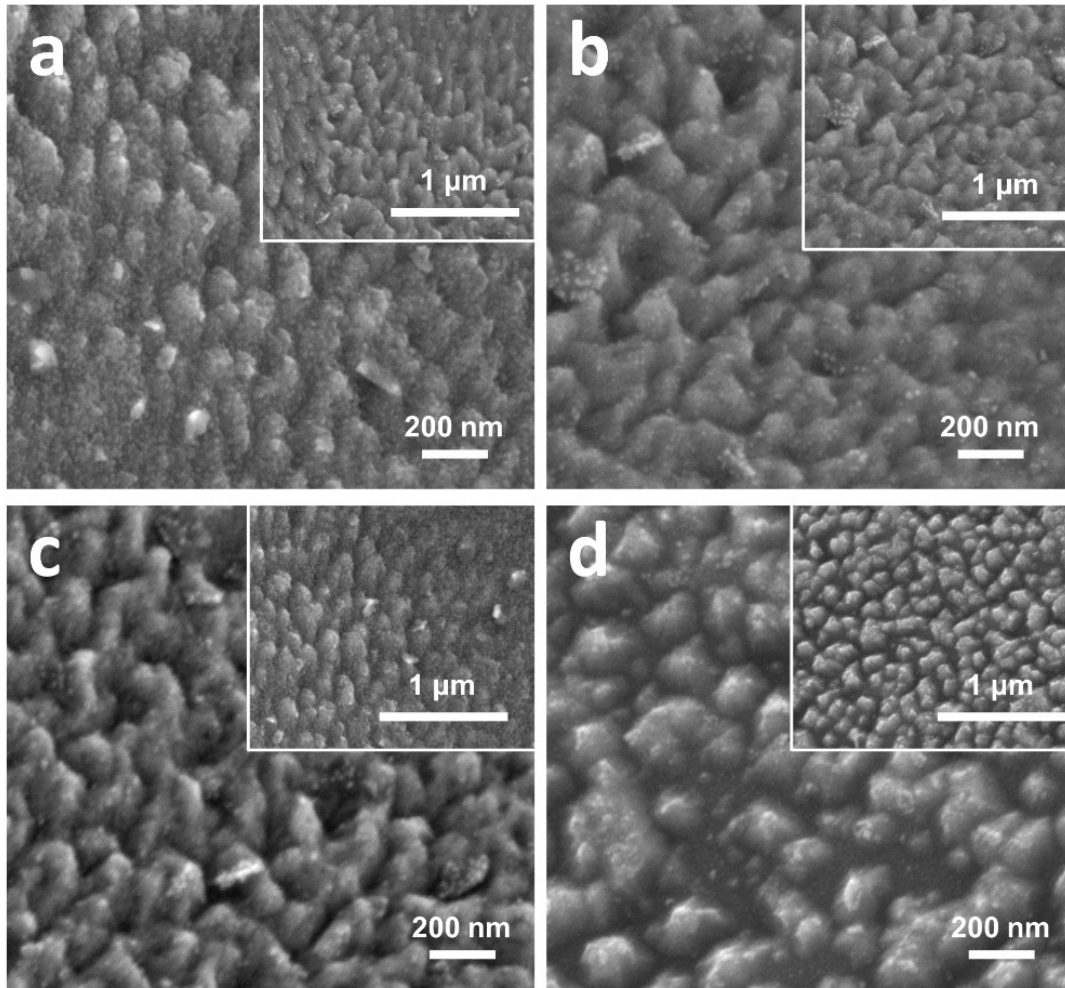

**Fig. S1.** SEM images of Au NPs-CF transmission SEIRAS substrate that prepared with various amount of H<sub>AuCl</sub><sub>4</sub> and PVP. Note that from **a** to **d** represent SEM image of the Au NPs-CF substrate prepared with excessive PVP, excessive H<sub>AuCl</sub><sub>4</sub>, the median dosage of H<sub>AuCl</sub><sub>4</sub> and PVP, and the optimized dosage, respectively. The concentrations of H<sub>AuCl</sub><sub>4</sub> solution (10 mL) from **a** to **d** were 0.1, 2.0, 1.0, and 0.2 mM, respectively. The volumes of PVP solution (0.05 g/mL) from **a** to **d** were 5.0, 0.5, 1.0, and 3.0 mL, respectively. The FDTD simulation was conducted to investigate the distribution of electromagnetic field along the x-y plane in these condition (Fig. S2).

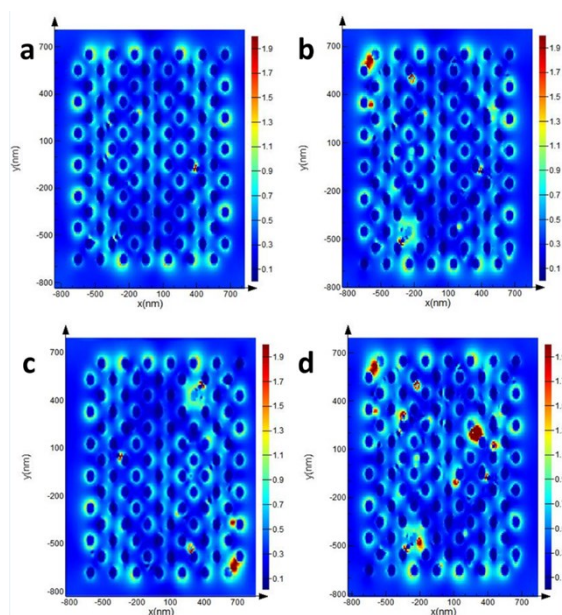

**Fig. S2.** Electromagnetic field distributions of x-y plane for the Au NPs-CF substrate that prepared with various amount of  $\text{HAuCl}_4$  and PVP. From **a** to **d** represent SEM image of the Au NPs-CF substrate prepared with excessive PVP, excessive  $\text{HAuCl}_4$ , the median dosage of  $\text{HAuCl}_4$  and PVP, and the optimized dosage, receptively. See the method section in support information for details.

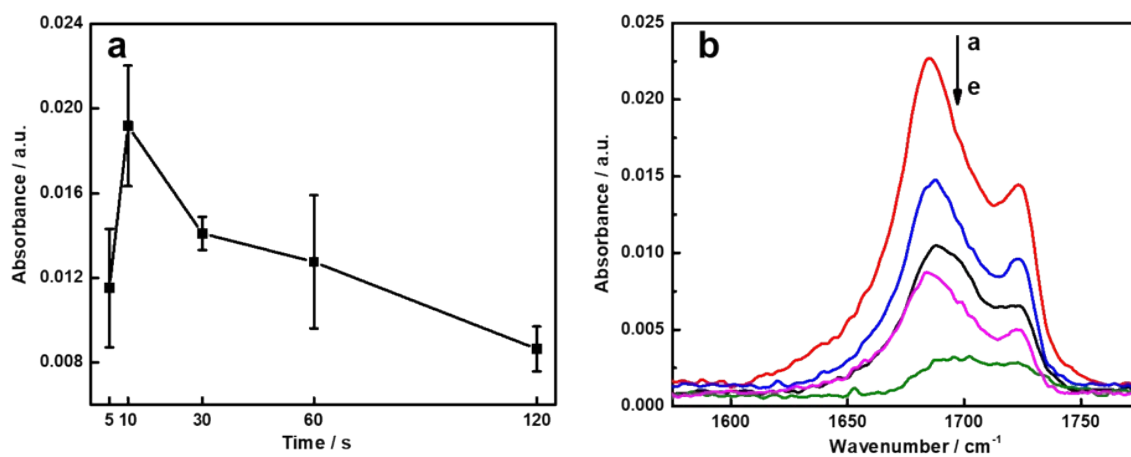

**Fig. S3. a** SEIRAS performance of Au NPs-CF substrates prepared under different reaction times. Error bars represent the SD of three measurements ( $n = 3$ ). **b** SEIRAS spectra obtained with Au NPs-CF

substrates prepared under different reaction times. From *a* to *e*, the reaction times were 10, 30, 60, 5, and 120 s, respectively. The CF was shaken in the mixture of 10 mL 0.2 mM HAuCl<sub>4</sub> and 3 mL 0.05 g/mL

PVP solution

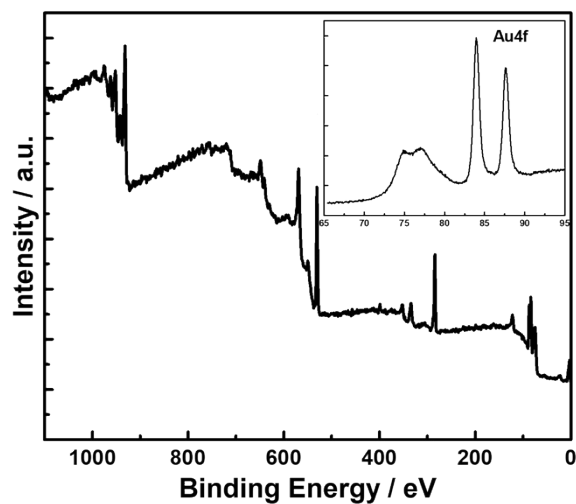

**Fig. S4.** XPS spectrum of Au NPs-CF transmission SEIRAS substrate and (insets) the narrow spectra of Au4f. The detailed information could be found in Tab. S1.

**Tab. S1.** Detailed information of the XPS spectrum of Au NPs-CF substrate.

| Name | Peak BE | Height CPS | FWHM eV | Area (P) CPS.eV | Area (N) | Atomic % |
|------|---------|------------|---------|-----------------|----------|----------|
| C1s  | 284.78  | 10726.54   | 1.23    | 19075.12        | 0.24     | 55.33    |
| Au4f | 83.97   | 9405.16    | 0.87    | 16967.38        | 0.01     | 2.8      |
| O1s  | 531.25  | 12451.11   | 1.92    | 27582.74        | 0.13     | 28.62    |
| Cu2p | 934.29  | 18870.21   | 1.32    | 95291.02        | 0.06     | 13.24    |

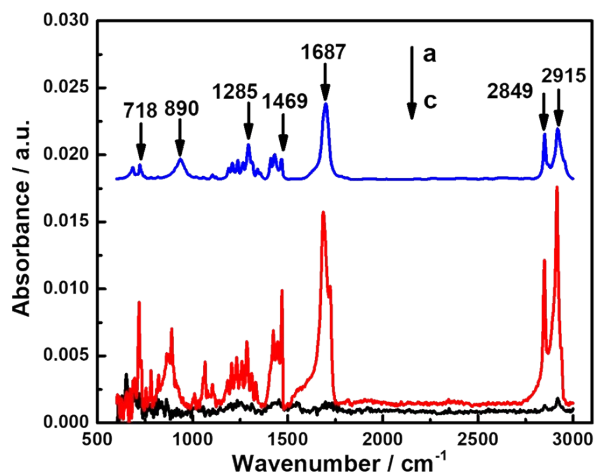

**Fig. S5.** IR transmission spectra of MUA. The spectra from *a* to *c* were obtained with KBr disk, Au NPs-CF substrate, and CF without Au NPs, respectively.

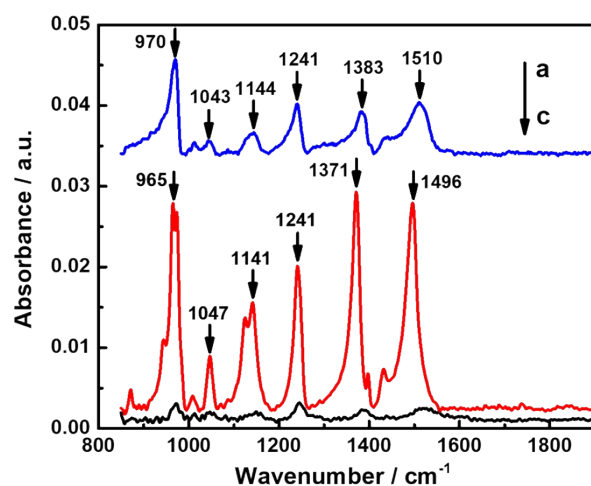

**Fig. S6.** IR transmission spectra of Ziram. The spectra from *a* to *c* were obtained with CaF<sub>2</sub> disk, Au NPs-CF substrate, and CF without Au NPs, respectively.

**Tab. S2** Peak assignment for Ziram <sup>a</sup>.

| frequency (cm <sup>-1</sup> ) | assignment               |
|-------------------------------|--------------------------|
| 965                           | $\nu(\text{C-S})$ motion |

|      |                                                                                                   |
|------|---------------------------------------------------------------------------------------------------|
| 1047 | $\nu(\text{C}=\text{S})$ motion                                                                   |
| 1141 | $\delta(\text{CNC})$ , $\delta(\text{HCN})$ , $\nu(\text{C-N})$ , and $t(\text{CH}_3)$ vibrations |
| 1241 | $\delta(\text{CNC})$ , $\delta(\text{HCN})$ , $\nu(\text{C-N})$ , and $t(\text{CH}_3)$ vibrations |
| 1371 | $\nu(\text{C-N})$ motion coupled to $\delta_s(\text{CH}_3)$                                       |
| 1496 | $\delta_{\text{as}}(\text{CH}_3)$                                                                 |

<sup>a</sup> From ref 20

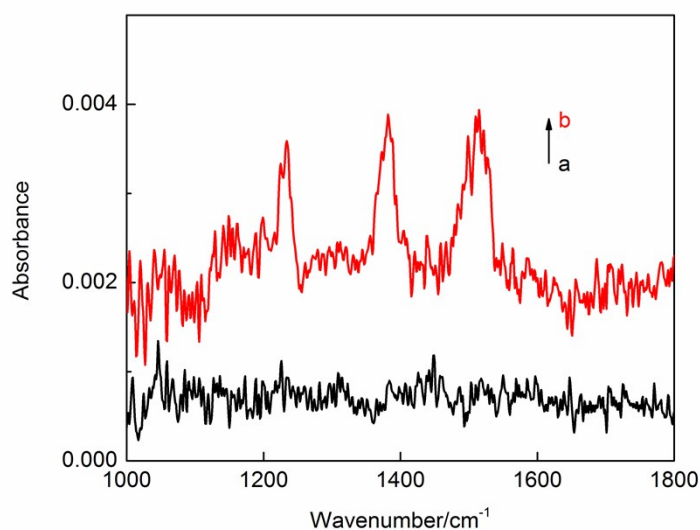

**Fig. S7.** SEIRAS spectra of Ziram at different concentrations obtained with Au NPs-CF substrate. From *a* to *b* represent 0 mg/mL and 0.018 mg/mL, respectively.

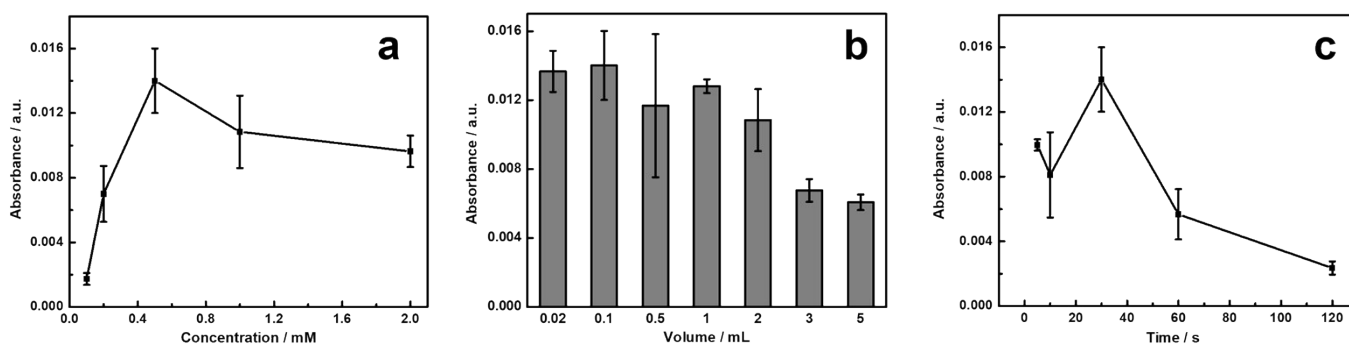

**Fig. S8.** **a** SEIRAS performance of Pt NPs-CF substrates that prepared with different concentrations of  $\text{H}_2\text{PtCl}_6$  solution (10 mL). **b** SEIRAS performance of Pt NPs-CF substrates that prepared with different

volumes of PVP solution (0.05 g/mL). **c** SEIRAS performance of Pt NPs-CF substrates prepared under different reaction times. All error bars represent the SD of three measurements ( $n = 3$ ). MUA (1 mM) was served as a probe molecule throughout the evaluation experiment. The characteristic peak at  $1687\text{ cm}^{-1}$  was analyzed.

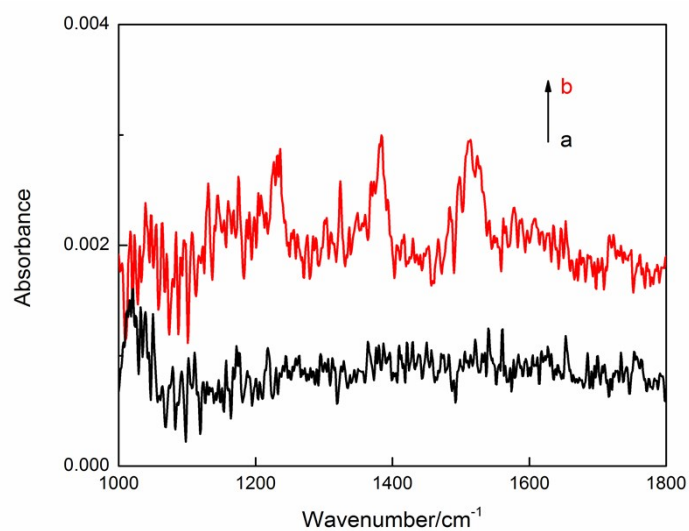

**Fig. S9.** SEIRAS spectra of Febram at different concentrations obtained with Pt NPs-CF substrate. From *a* to *b* represent 0 mg/mL, and 0.025 mg/mL, respectively.

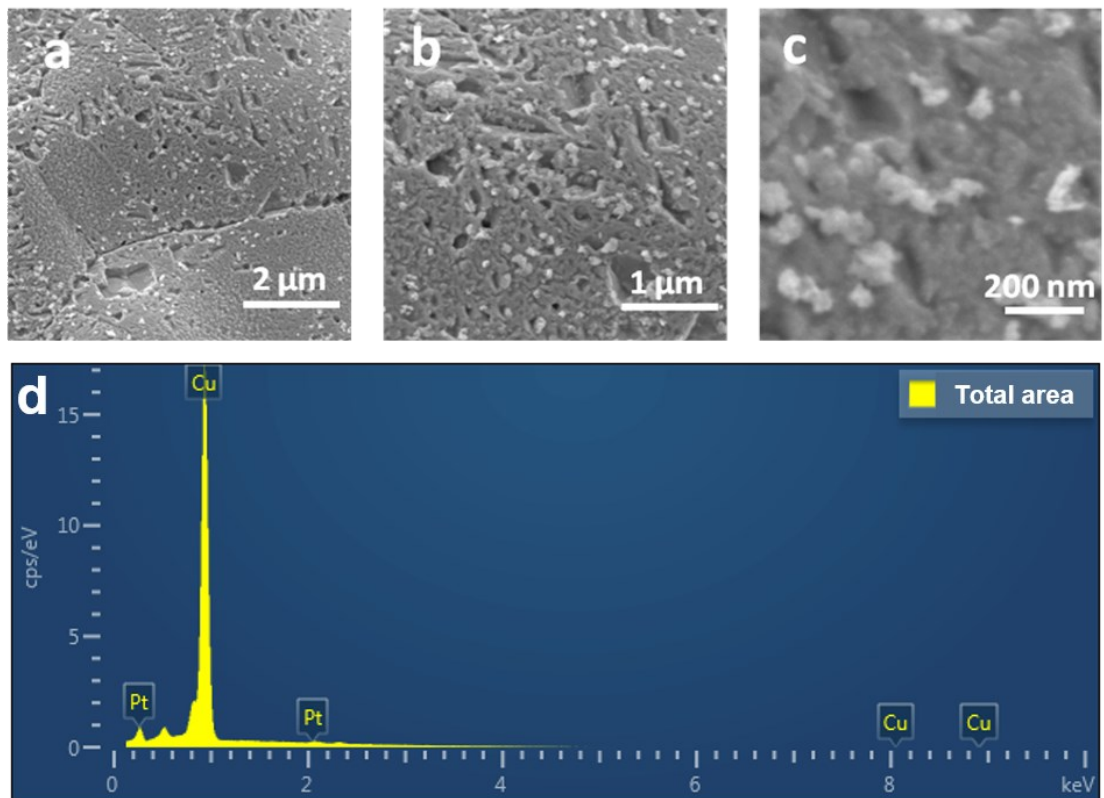

**Fig. S10.** a-c SEM images of Pt NPs-CF transmission SEIRAS substrate. **d** EDS result of Pt NPs-CF transmission SEIRAS substrate. The atomic percentage (%) of Pt, Cu were 3.33 and 96.67, respectively.

The distribution of Pt and Cu in the characterization area of EDS was shown in Fig. S10.

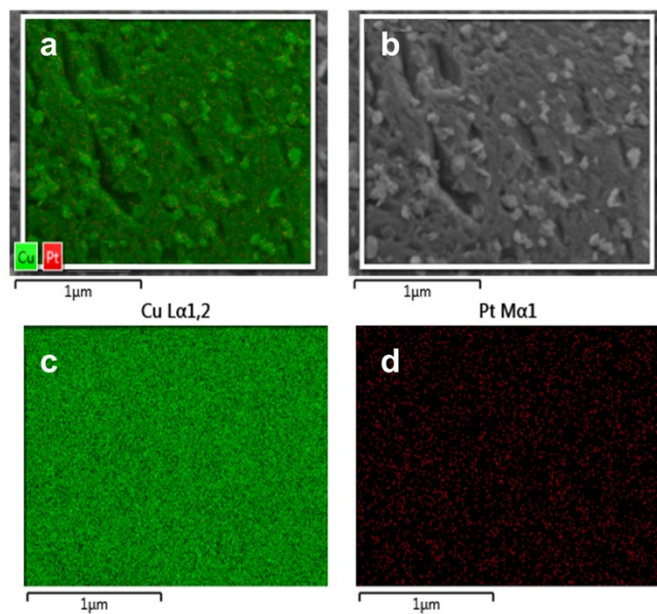

**Fig. S11.** The distribution of Pt and Cu in the characterization area of EDS. **a** EDS layered image. **b**



Electronic image. **c** Distribution image of Cu. **d** Distribution image of Pt.

## **Methods**

**Sample preparation.** The prepared MNPs-CF transmission SEIRAS substrates were immersed in analyte (MUA/ Ziram/ Ferbam) solution for 30 mins with gentle shaken (120 r/min). The concentration of MUA was 1 mM. The gradient concentrations of Ziram and Ferbam were prepared (Fig. 4 and Fig. 5). Finally, the MNPs-CF was dried in N<sub>2</sub> flow before measurement. Each sample carried out 3 parallel experiments.

**Parameter settings.** The MNPs-CF substrates were measured by Fourier Transform Infrared (FT-IR) Spectrometer (Perkin Elmer, Spectrum Two) with transmission mode. The spectral resolution is adjusted to 4 cm<sup>-1</sup>, the number of scans is 10 times, and the scanning range is 400 - 4000 cm<sup>-1</sup>.

**Numerical Simulations.** The electromagnetic distributions (Fig. S2) were calculated by the 3D FDTD numerical method (Lumerical Solutions, Canada). In simulations, a Total-Field Scattered-Field (TFSF) source was used to illuminate at the normal incident angle. The CF was used as a solid support material, and the Au NPs were randomly distributed. The simulation time was set to 1000 fs to guarantee convergence. A nonuniform mesh method was employed to save computation time. The dielectric function of Au was taken from a multi-coefficient fitting model offered by FDTD software.
